# Supplementary material
Source: PubMed Central journal article supplement (PMC8752286)
Supplement: mmc1.pdf [file mmc1.pdf]

Severe

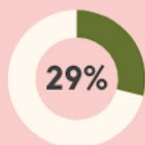

Mild

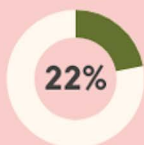

6-minute walk test  
under lower limit

VS.

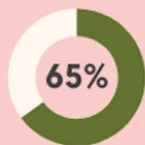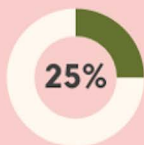

Fibrotic changes on  
computer tomography

Patients with  
**severe disease**

4.6x

↑ Impaired  
lung diffusion

2.7x

↑ Fatigue

compared to **mild**

ICU patients

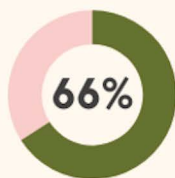

Dyspnea

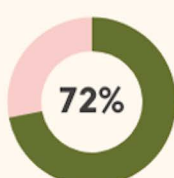

Fatigue

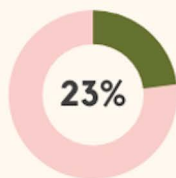

Pulmonary embolism

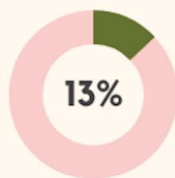

Mood, anxiety or  
psychiatric disorder

VS.

Non-ICU patients

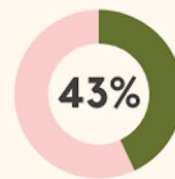

Dyspnea

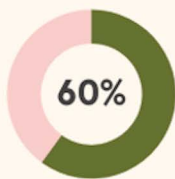

Fatigue

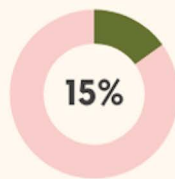

Pulmonary embolism

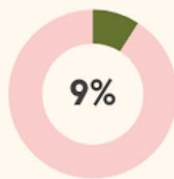

Mood, anxiety or  
psychiatric disorder
