# Supplementary material
Source: PubMed Central journal article supplement (PMC8752286)
Supplement: mmc2.pdf [file mmc2.pdf]

**Initial screen**

**Symptomatic or hospitalized Post-COVID patient**

**Point of care (POC) screening**

EKG, PFT, 6MWT, Pulse Ox, Tilt Table

Labs: chem 7, CBC, TSH, glucose, D-dimer, coagulation studies, CRP, troponin-T, fecal culture, ESR, COVID-19 serology or PCR

Other screens: fecal cultures, neuropsychiatric screenings for mood disorder, PTSD, and OCD

! Rule out **POTS** for dizziness and weakness

**Abnormal POC result**

**Increased work-up**

**Referral to specialist**

Echocardiogram, angiography, CT chest, cardiac catheterization, MRI, transesophageal cardiography,

! Rule out **SECONDARY infection** (mucormycosis)

**After diagnosis**

**Manage with standard guidelines**

**Manage with Post-COVID guidelines**

Medications, physical therapy, psychotherapy,

Nutrition, individualized exercise programs

Mindfulness, meditation, breathing exercises (pranayama)

! Topic is rapidly updating, check for **most recent GUIDELINES**
