# Supplementary material
Source: PubMed Central journal article supplement (PMC8752286)
Supplement: mmc3.pdf [file mmc3.pdf]

**Supplemental Table 1:** Timeline and categories of acute and post-acute COVID-19 as defined by different organizations.

| System                                                             | Name(s) used for post-acute COVID-19                           | Severity classification of acute COVID-19                                                                                                                                                                                                                                                                                                                                                                                                                                                                                                                                                              | Timeline of post-acute COVID-19                                                            | Systemic or symptomatic subcategories of post-acute COVID-19                                                                                                                                                                                                        |
|--------------------------------------------------------------------|----------------------------------------------------------------|--------------------------------------------------------------------------------------------------------------------------------------------------------------------------------------------------------------------------------------------------------------------------------------------------------------------------------------------------------------------------------------------------------------------------------------------------------------------------------------------------------------------------------------------------------------------------------------------------------|--------------------------------------------------------------------------------------------|---------------------------------------------------------------------------------------------------------------------------------------------------------------------------------------------------------------------------------------------------------------------|
| <b>Center for Disease Control and Prevention</b><br><sup>1,2</sup> | Post-acute hyperinflammatory illness (PHI); late sequelae (LS) | <p>Mild to moderate: 81%<br/>Mild symptoms up to pneumonia</p> <p>Severe: 14%<br/>Dyspnea, hypoxia, or more than 50% lung involvement on imaging</p> <p>Critical: 5%<br/>Respiratory failure, shock, or multiorgan system dysfunction</p>                                                                                                                                                                                                                                                                                                                                                              | <p>Week 0: symptom onset</p> <p>Week 2: PHI includes MIS-C and MIS-A</p> <p>Week 4: LS</p> | <p>PHI- Viral test (+/-) and antibody (+)</p> <p>Gastrointestinal, cardiovascular, dermatological/mucocutaneous, respiratory, neurological, musculoskeletal</p> <p>LS- No characterized profile</p> <p>Cardiovascular, pulmonary, neurological, and psychiatric</p> |
| <b>National Institute of Health</b> <sup>3</sup>                   | Long-COVID; post-acute sequelae of COVID (PASC); long haulers  | <p>Asymptomatic:<br/>Viral test (+) or antibody (+)<br/>symptom (-)</p> <p>Mild:<br/>Viral test (+) or antibody (+)<br/>symptom (+, - dyspnea, SOB, imaging)</p> <p>Moderate:<br/>Viral test (+) or antibody (+)<br/>symptom (+)<br/>(SpO<sub>2</sub>) ≥94% on room air at sea level</p> <p>Severe:<br/>Viral test (+) or antibody (+)<br/>symptom (+)<br/>(SpO<sub>2</sub>) ≤ 94% on room air at sea level, PaO<sub>2</sub>/FiO<sub>2</sub>) &lt;300 mm Hg, respiratory frequency &gt;30 breaths/min, or lung infiltrates &gt;50%</p> <p>Critical: Viral test (+) or antibody (+)<br/>symptom (+)</p> | Sequelae that extend > 4 weeks after initial infection                                     | Fatigue, cardiopulmonary, neuropsychiatric,                                                                                                                                                                                                                         |

|                                                                        |                                                                                                                                                                                                                 |                                                                                                                                                                                                          |                                                                                                                                                           |                                                                                             |
|------------------------------------------------------------------------|-----------------------------------------------------------------------------------------------------------------------------------------------------------------------------------------------------------------|----------------------------------------------------------------------------------------------------------------------------------------------------------------------------------------------------------|-----------------------------------------------------------------------------------------------------------------------------------------------------------|---------------------------------------------------------------------------------------------|
|                                                                        |                                                                                                                                                                                                                 | Respiratory failure, septic shock, multiple organ dysfunction                                                                                                                                            |                                                                                                                                                           |                                                                                             |
| <b>World Health Organization</b> <sup>4</sup>                          | Post-COVID condition; chronic COVID syndrome; late sequelae of COVID-19; long COVID; long haul COVID; long-term COVID-19. post-COVID syndrome; post-acute COVID-19; post-acute sequelae of SARS-CoV-2 infection | Mild: exposure (day 0), symptom onset (day 5-6), recovery (week 2)<br><br>Severe: exposure (day 0), symptom onset (day 5-6), recovery (week 6)                                                           | Any symptom that lasts for weeks to months after recovery from acute illness                                                                              | Cardiovascular, respiratory, dermatologic, neurologic, psychiatric                          |
| <b>European Centre for Disease Prevention and Control</b> <sup>5</sup> | post-acute COVID-19; chronic COVID-19; sub-acute or ongoing symptomatic COVID-19; post-COVID condition; long COVID                                                                                              | Mild: no hospitalization or advanced care but still symptomatic<br><br>Severe: Prolonged viral shedding, increased viral load, prolonged symptoms more common, requires hospitalization or advanced care | Week 0: symptom onset<br><br>Week 3: post-acute COVID-19<br><br>Week 4 to 12: sub-acute or ongoing symptomatic COVID-19<br><br>Week 12+: chronic COVID-19 | Respiratory, cardiovascular, neuropsychiatric, endocrine, gastrointestinal, renal, and skin |

a FIO<sub>2</sub>, fraction of inspired oxygen; MIS-A, Multisystem inflammatory syndrome in adults; MIS-C, Multisystem inflammatory syndrome in children; PaO<sub>2</sub>, partial pressure of oxygen; SpO<sub>2</sub>, oxygen saturation

**Supplemental Figure 1: Effect of severe disease and ICU admission on post-COVID symptom prevalence.**<sup>6-10</sup> Images created with open-source images from Canva®

(<https://www.canva.com>)

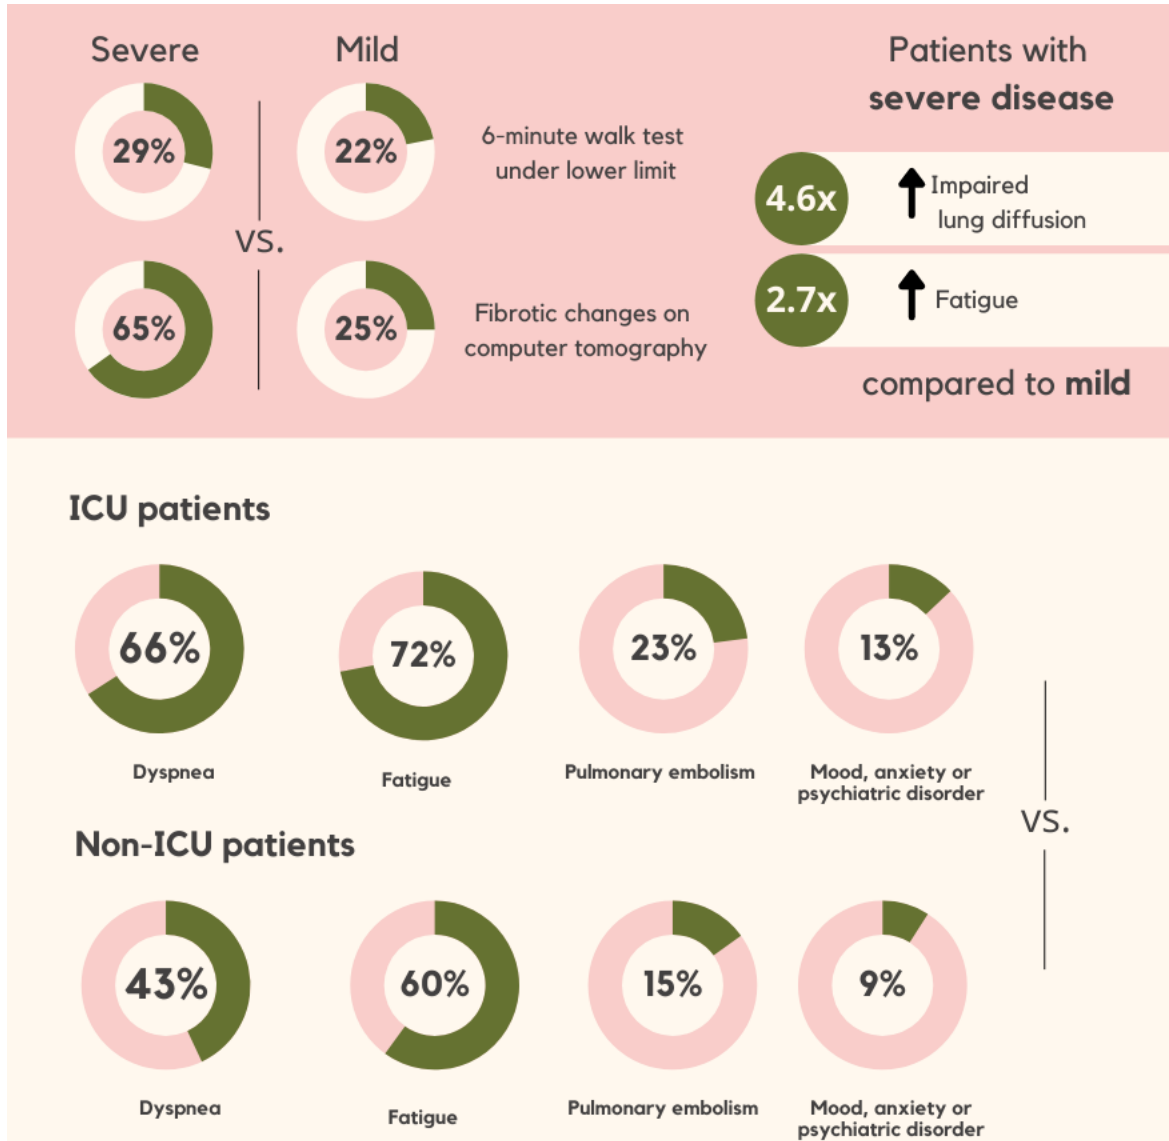

a ICU, intensive care unit

**Supplemental Figure 2: Triage at time of initial follow-up for post-acute COVID-19.** Images created using Microsoft® PowerPoint®

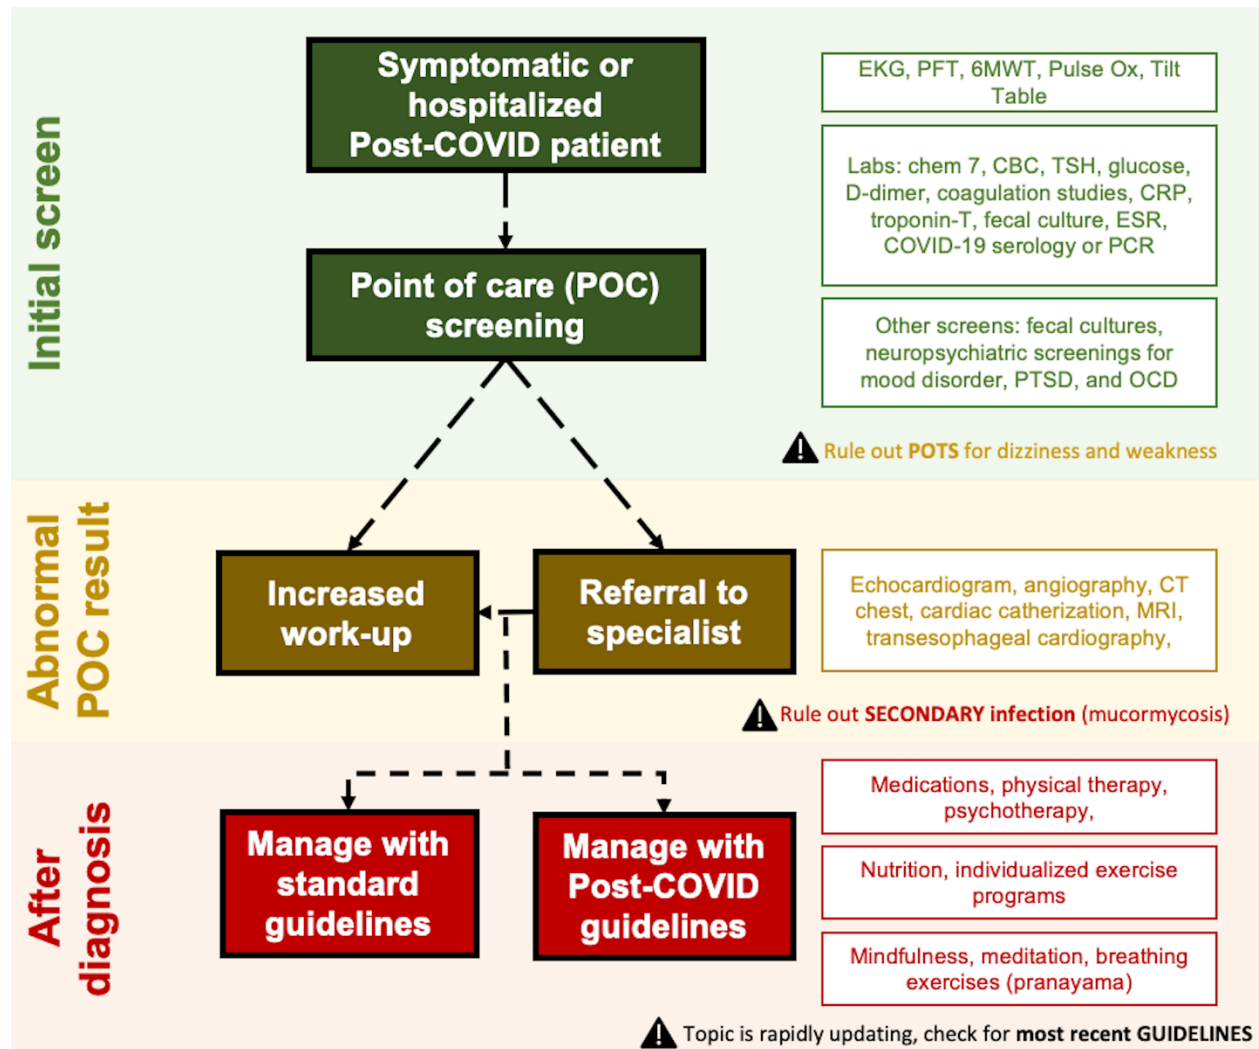

a 6MWT, 6-minute walk test; CBC, complete blood count; CT, computerized tomography; EKG, electrocardiogram; ESR, erythrocyte sedimentation rate; MRI, magnetic resonance imaging; OCD, obsessive compulsive disorder; PCR, polymerized chain reaction; PFTS, pulmonart function tests; PTSD, post-traumatic stress disorder; Pulse Ox, pulse oxygen; TSH, thyroid stimulating hormone

**References**

1. Datta SD, Talwar A, Lee JT. A Proposed Framework and Timeline of the Spectrum of Disease Due to SARS-CoV-2 Infection: Illness Beyond Acute Infection and Public Health

- Implications. *JAMA*. 2020;324(22):2251-2252.
2. Center for Disease Control and Prevention (CDC). Management of Patients with Confirmed 2019-nCoV. <https://www.cdc.gov/coronavirus/2019-ncov/hcp/clinical-guidance-management-patients.html>. Accessed July 4, 2021.
  3. National Institutes of Health (NIH). Clinical Spectrum | COVID-19 Treatment Guidelines. <https://www.covid19treatmentguidelines.nih.gov/overview/clinical-spectrum/>. Accessed June 29, 2021.
  4. World Health Organization (WHO). The latest on the covid-19 global situation & long-term sequelae. Update on Clinical long-term effects of COVID-19. [https://www.who.int/docs/default-source/coronaviruse/risk-comms-updates/update54\\_clinical\\_long\\_term\\_effects.pdf?sfvrsn=3e63eee5\\_8](https://www.who.int/docs/default-source/coronaviruse/risk-comms-updates/update54_clinical_long_term_effects.pdf?sfvrsn=3e63eee5_8). Accessed July 4, 2021.
  5. Yoo JR, Heo ST. Clinical characteristics of COVID-19. *J Med Life Sci*. 2020;17(2):33-40.
  6. Huang C, Huang L, Wang Y, et al. 6-month consequences of COVID-19 in patients discharged from hospital: a cohort study. *Lancet*. 2021;397(10270):220-232.
  7. Zhao Y-M, Shang Y-M, Song W-B, et al. Follow-up study of the pulmonary function and related physiological characteristics of COVID-19 survivors three months after recovery. *EClinicalMedicine*. 2020;25:100463.
  8. Halpin SJ, McIvor C, Whyatt G, et al. Postdischarge symptoms and rehabilitation needs in survivors of COVID-19 infection: A cross-sectional evaluation. *J Med Virol*. 2021;93(2):1013-1022.
  9. Roncon L, Zuin M, Barco S, et al. Incidence of acute pulmonary embolism in COVID-19

patients: Systematic review and meta-analysis. *Eur J Intern Med.* 2020;82:29-37.

10. Taquet M, Geddes JR, Husain M, Luciano S, Harrison PJ. 6-month neurological and psychiatric outcomes in 236 379 survivors of COVID-19: a retrospective cohort study using electronic health records. *The Lancet Psychiatry.* 2021;8(5):416-427.
